# Supplementary material for: Epstein–Barr Virus Lytic Reactivation Induces IgG4 Production by Host B Lymphocytes in Graves' Disease Patients and Controls: A Subset of Graves' Disease Is an IgG4-Related Disease-Like Condition
Source: PubMed Central journal article supplement — Viral Immunol. 2018 Oct 10;31(8):540–7. doi: 10.1089/vim.2018.0042 (PMC6205085; doi:10.1089/vim.2018.0042), 2018-10-10
Supplement: Supp_Fig1.pdf [file Supp_Fig1.pdf]

# Supplementary Figure 1 Positive control of 72A1(+) cells

72A1 (anti-EBV-gp350/220)  
(Alexa Fluor488)

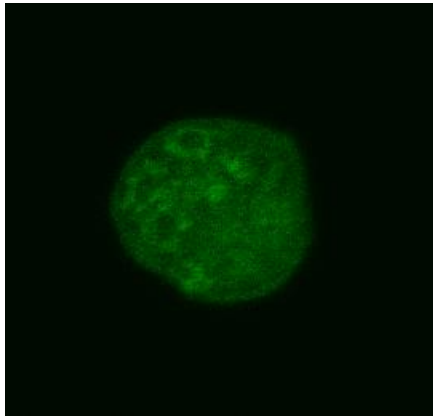

Merged with DAPI

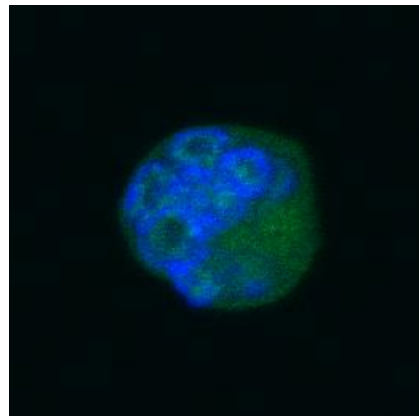

We used 33°C reactivated P3HR-1 cells as a positive control of the 72A1 (anti-gp350/220) stain.

Green signals of Alexa Fluor488 represent 72A1.

Abbreviations

EBV: Epstein-Barr virus

gp: glycoprotein

DAPI: 4', 6-Diamidino-2-phenylindole
