# Supplementary material for: Epstein–Barr Virus Lytic Reactivation Induces IgG4 Production by Host B Lymphocytes in Graves' Disease Patients and Controls: A Subset of Graves' Disease Is an IgG4-Related Disease-Like Condition
Source: PubMed Central journal article supplement — Viral Immunol. 2018 Oct 10;31(8):540–7. doi: 10.1089/vim.2018.0042 (PMC6205085; doi:10.1089/vim.2018.0042), 2018-10-10
Supplement: Supp_Table1.pdf [file Supp_Table1.pdf]

## Supplementary Data

SUPPLEMENTARY TABLE S1. FLOW CYTOMETRY INDICATED CULTURE CELLS ON DAY 5 AFFECTED BY THE INDUCTION OF EPSTEIN-BARR VIRUS REACTIVATION AND CONTAINED IGG4(+)/72A1(+) DOUBLE-POSITIVE CELLS

| <i>Subject</i>        | <i>Control 10</i> | <i>Control 11</i> | <i>Patient 3</i> | <i>Patient 6</i> | <i>Mean</i> |
|-----------------------|-------------------|-------------------|------------------|------------------|-------------|
| 72A1(+) cells         | 10.21             | 22.93             | 4.13             | 2.26             | 9.88        |
| IgG4(+) cells         | 1.75              | 1.27              | 2.04             | 46.60            | 12.92       |
| Double-positive cells | 0.40              | 1.11              | 0.67             | 2.26             | 1.11        |

Percentage of gated cells in lymphocytes.

72A1, antibody against glycoprotein 350/220 expressed in the late phase of EBV reactivation; EBV, Epstein-Barr Virus.
