# Supplementary figures and images for: Epstein–Barr Virus Lytic Reactivation Induces IgG4 Production by Host B Lymphocytes in Graves' Disease Patients and Controls: A Subset of Graves' Disease Is an IgG4-Related Disease-Like Condition
Source: PubMed Central journal article supplement — Viral Immunol. 2018 Oct 10;31(8):540–7. doi: 10.1089/vim.2018.0042 (PMC6205085; doi:10.1089/vim.2018.0042), 2018-10-10

# Supplementary Figure 2

## Class-switch recombination for IgG4

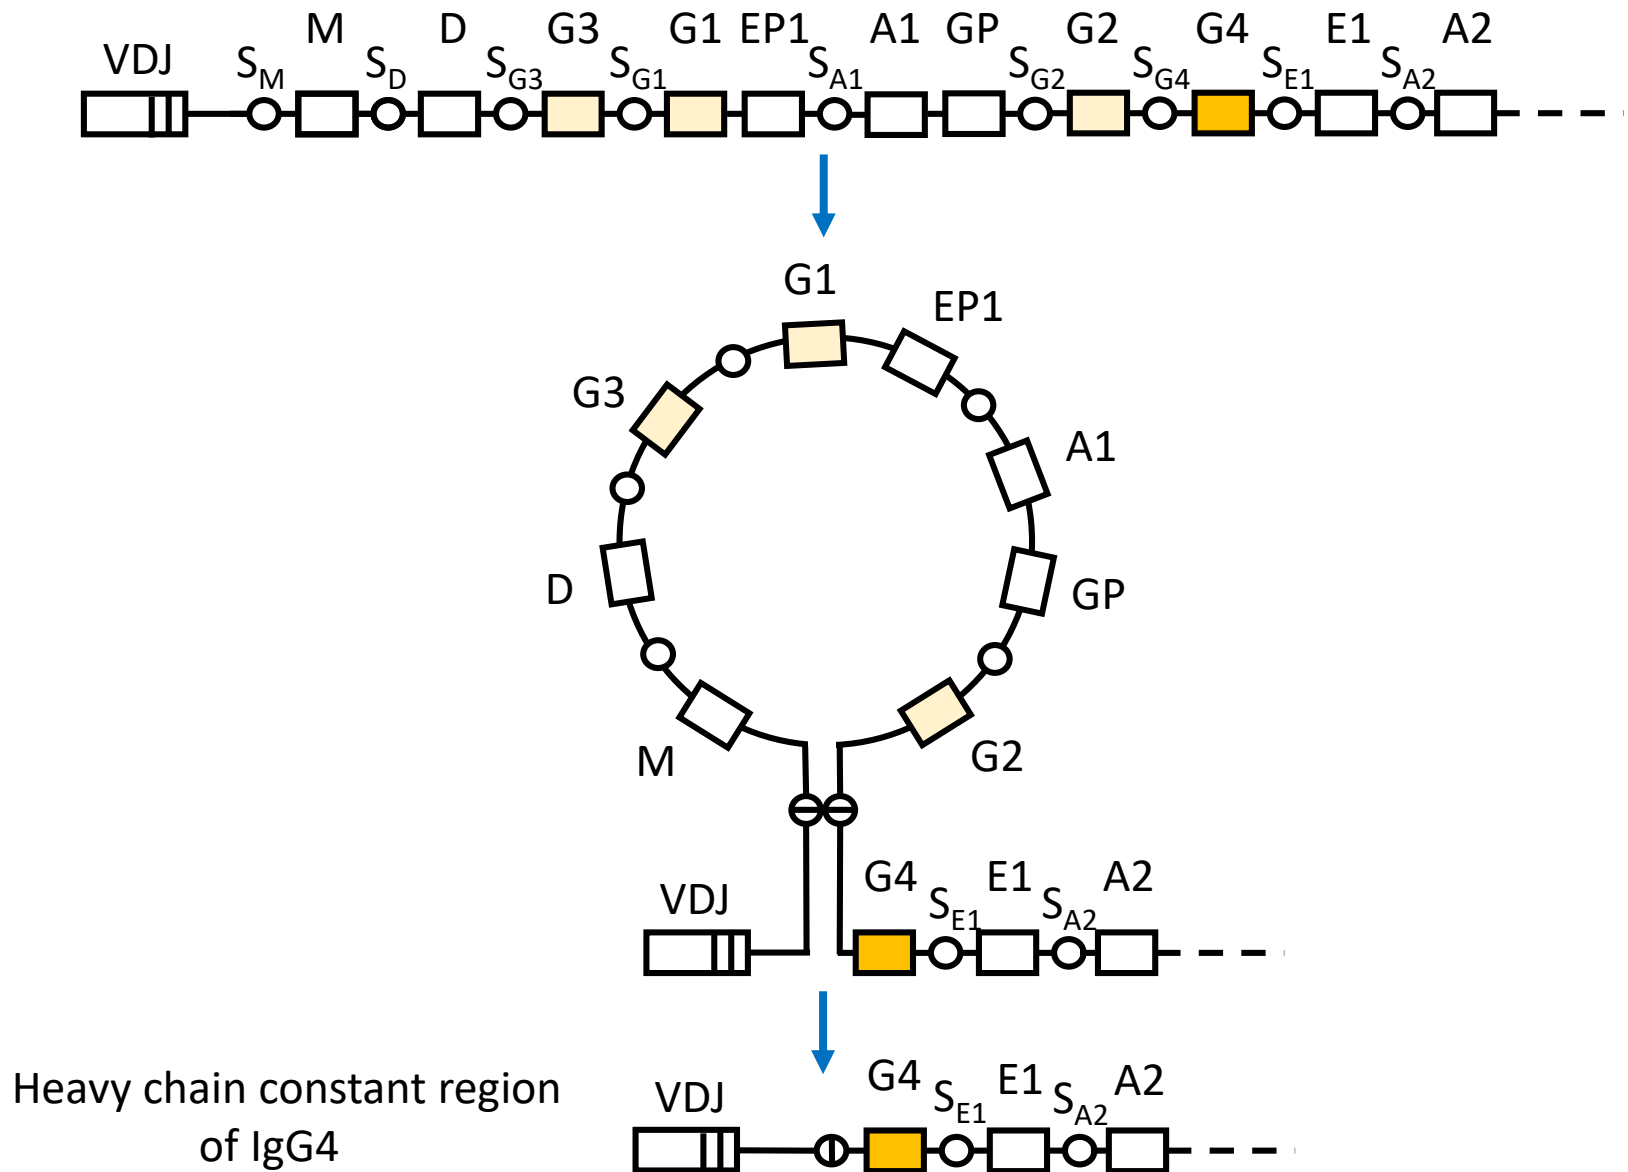

Supplement: Supp_Fig2.pdf [file Supp_Fig2.pdf]
